# I want to move my body - right now! The CRAVE Scale to measure state motivation for physical activity and sedentary behavior

Matthew A. Stults-Kolehmainen<sup>1,2\*†</sup>, Miguel Blacutt<sup>2\*†</sup>, Todd A. Gilson<sup>3\*</sup>, Philip R. Stanforth<sup>4</sup>, Amanda L. Divins<sup>5</sup>, John B. Bartholomew<sup>4</sup>, Nia Fogelman<sup>6</sup>, Garrett I. Ash<sup>7,8</sup>, Joseph T. Ciccolo<sup>2</sup>, Line Brotnow Decker<sup>9,10</sup>, Susannah L. Williamson<sup>11</sup>, Rajita Sinha<sup>6,9</sup>

<sup>1</sup>Bariatric and Minimally Invasive Surgery Program, Yale New Haven Hospital, New Haven, Connecticut, United States of America

<sup>2</sup>Department of Biobehavioral Sciences, Teachers College, Columbia University, New York, New York, United States of America

<sup>3</sup>Department of Kinesiology and Physical Education, Northern Illinois University, DeKalb, Illinois, United States of America

<sup>4</sup>Department of Kinesiology and Health Education, The University of Texas at Austin, Austin, Texas, United States of America

<sup>5</sup>Department of Health and Human Performance, Northwestern State University, Natchitoches, Louisiana, United States of America

<sup>6</sup>Yale Stress Center, Yale School of Medicine, New Haven, Connecticut, United States of America

<sup>7</sup>Pain, Research, Informatics, Medical Comorbidities and Education Center (PRIME), VA Connecticut Healthcare System, West Haven, Connecticut, United States of America

<sup>8</sup>Center for Medical Informatics, Yale School of Medicine, New Haven, Connecticut, United States of America

<sup>9</sup>Yale Child Study Center, Yale School of Medicine, New Haven, Connecticut, United States of America

<sup>10</sup>Department of Psychiatric Research, Akershus University Hospital, Nordbyhagen, Norway

<sup>11</sup>Department of Health and Kinesiology, Texas A&M University, College Station, Texas, United States of America

## \* Correspondence:

Matthew Stults-Kolehmainen

[Matthew.stults-kolehmainen@ynhh.org](mailto:Matthew.stults-kolehmainen@ynhh.org)

Miguel Blacutt

[meb2305@tc.columbia.edu](mailto:meb2305@tc.columbia.edu)

Todd A. Gilson

[tgilson@niu.edu](mailto:tgilson@niu.edu)

† These authors share first authorship.

**Keywords:** urge for movement, desire, sedentary activity, physical activity, scale development, motivation, exercise, factor analysis

**Abstract**

Energy expenditure undulates throughout the day and likely motivation for it. The aim of this investigation was to create a short assessment (CRAVE) to measure transient wants or desires for physical activity and sedentary behaviors. Five studies were conducted to construct and validate the scale, with 1035 subjects completing the scale a total of 1,697 times. In Study 1, participants ( $n= 402$ ,  $M_{age} = 20.9\pm 3.2$ ) completed a questionnaire inquiring about the “want” or “desire” to perform behaviors “at the present moment”. Seven items related to physical activity (e.g., move my body). Eight items addressed sedentary behaviors (e.g., rest my body). Exploratory factor analysis revealed that 13 items should be retained, loading onto two factors (rest, move). In Study 2 ( $n= 444$ ,  $M_{age} = 20.3\pm 2.9$ ) a confirmatory factor analysis revealed a good fit for the model (CFI=.99, RMSEA=.049). Items loaded strongly onto two latent factors ( $>.7$ ). Rest/move were inversely related for both sets of factor analyses ( $-.75$  for both). In Study 3, 127 participants ( $M_{age} = 28.1\pm 7.9$ ) completed the CRAVE up to 10 times over a 2-year period. Cronbach alphas were high ( $\geq .86$ ). A linear mixed model revealed that test-retest reliability was stronger when the CRAVE was administered twice on the same day ( $\geq .73$ ) than compared to retest over 6-month intervals ( $\geq .37$ ). In Study 4, a maximal treadmill test was completed by 21 participants ( $M_{age} = 20.5\pm 1.4$ ). The CRAVE was completed immediately pre and post, along with other surveys for perceived physical fatigue. Desire to move decreased 35% and rest increased 61%. Changes in perceived physical fatigue correlated with move ( $r= -.52$ ) and rest ( $r= .53$ ). In Study 5, 41 university students ( $M_{age} = 22.5\pm 5.1$ ) sat quietly during a 50-minute lecture. They completed the CRAVE at 3 times points along with the Activation/Deactivation Checklist. Desire to move increased 15% while rest decreased 15%. Perceived energy, but not tension, was related to both move ( $r= .38$ ) and rest ( $r= -.38$ ). In conclusion, the CRAVE scale has good psychometric properties. Future studies need to explore how desires to move and rest relate to dynamic changes in physical activity and sedentarism.

## Introduction

Conditions such as obesity, cardiovascular disease (CVD) and diabetes are all related to a lack of muscular movement and minimal energy expenditure (EE) (54). EE, however, is affected by distinct behaviors falling in two dichotomous categories: physical activity (P.A.; i.e., occupational activity, active transit, exercise) and sedentary behavior (e.g., sitting, watching TV, sleep). These are ostensibly separate but not mutually exclusive constructs, which have independent and interacting effects on health (51, 53). Recent evidence indicates that humans display substantial variability in engaging in active and sedentary behaviors. For instance, some individuals achieve high levels of activity but also high levels of sedentarism (80). Given the distinction between PA and inactivity, growing importance is being placed on trying to understand the antecedents or *determinants* of these two behaviors, from the levels of the environment to the gene (7, 60). Motivation appears to be a key intermediary. Unfortunately, there is a gap in our current understanding of how the environment and the brain interact to actually motivate movement and sedentary behaviors, particularly on a *moment to moment basis*, which suggests that additional mechanisms may be responsible for their linkage (7).

Research in the area of motivational processes has greatly lagged behind work in the area of cognition and emotion (18), but newer models are reviving older perspectives and synthesizing this with data that suggests that motivated behavior starts with *desires* and *urges* (8, 19, 28, 31, 32, 58, 61). Two dual-process models of physical activity have recently emerged- the Affective Reflective Theory of Physical Inactivity and Exercise (12) and the Affect and Health Behavior Framework (87). Both of these models view physical activity and sedentary outcomes as the consequence of interactions between two systems, one responsible for affective processing and one responsible for intentional planning, goal setting and other cognitive processes. Brand and Ekkekakis (2018) incorporate Lewin's (44) ideas of driving forces and restraining forces, the interplay of which results in tensions. In ART, the affective system operates with automatic processes of stimulus conditioning and hedonic value assessment result in an *action impulse*, which is the antecedent to physically active behavior. They also note that "...core affective valence may have a direct, immediate impact on behavior through behavioral *urges*" (12). The AHBF model (87) specifies that the faster, affective system operates on behavior through two intermediaries: automatic motivation (i.e., "wanting", "dread") and affectively charged motivational states (i.e., "craving & desire", fear). A total lack of desire is a hallmark of amotivation as outlined in Self-Determination Theory (75). How feelings of urges, wants, desires and cravings relate and differ is currently the subject of another paper in this Special Issue of this journal (**Citation intentionally omitted**). Unfortunately, these models have not been tested rigorously to understand the strength of the association between desires/urges and physically active behaviors.

Despite the lack of data in this area, there is a preponderance of information about desire for movement in other relevant literatures. Urges to move, especially at night, are a defining characteristic of Restless Leg Syndrome, which may affect other parts of the body as well (20, 37, 63). Urges to move the entire body, particularly for the purpose of energy expenditure are also a key symptom of exercise dependence (24). Long-term use of anti-psychotic medication can result in psychogenic movement disorders, such as tardive dyskinesia and akathisia, the latter of which results in a pressing need to constantly fidget and move about (35). Aside from these clinical presentations, desires to move may manifest in response to environmental conditions, like upbeat rhythmic music. Groove is a state of clearly desiring to move the body in response to a rhythm or harmony (43, 47). Other researchers have identified desires as being specific to fitness, for instance, a desire to gain muscular strength (38) or even to generally engage in sport (30, 32). In some cases, dopamine receptor-blocking agents can induce tardive dyskinesia, which results to an inner urge to move that manifests in chorea, dystonia, akathisia, tics and tremors (79). Even animals clearly demonstrate urges to move when deprived of it, what is known as "appetence" for muscular motion (19). Finally, in ancient philosophy, Aristotle

121 concluded, “It is manifest, therefore, that what is called desire is the sort of faculty in the [mind] which  
122 initiates movement” (2, 49, 67) Further information about the conceptual basis of desire in physical  
123 activity can be found in an article in this same Special Issue (**Citation intentionally omitted**).  
124 Consequently, modern exercise psychology theories appear to be supported by a variety of scientific and  
125 theoretical evidence spanning the course of history.

126 At this juncture, there is intersecting research strongly suggesting that humans possess wants /  
127 desires for movement and rest behaviors (8, 19). However, scientific inquiry to strengthen our  
128 understanding of these desires is currently impeded by a lack of validated instrumentation (55). Only  
129 single-item surveys of desire for physical activity exist, such as of state motivation for specific exercise  
130 tasks, or desires for fitness, all of which lack validation (34, 38). On the other hand, there has been  
131 substantial development of instruments to assess desire, wanting and craving for reward substances,  
132 foods and behaviors (11, 66, 68, 81) and neurobiological substrates associated with desire and craving  
133 states (70).

134 The aim of the current investigation, therefore, is to create and validate an instrument which  
135 could be utilized to measure subjective ratings of desire or want for movement behaviors and sedentary  
136 behaviors. Based on previous literature, we hypothesized that: 1) humans have a measurable motivation  
137 to move that may be measured as a want or desire (or urge), and, 2) want or desire for  
138 movement/physical activity are separable from want / desire to rest or be sedentary (i.e., load on  
139 different factors), 3) wants / desires are transitory or possess state-like qualities and can be measured  
140 reliably in the current moment, 4) these motivational states will change with the provision of prolonged  
141 rest and exercise and 5) a scale to measure desires/wants will have acceptable construct, and more  
142 specifically, convergent validity. In regard to hypothesis 2, it could be argued that additional desire/want  
143 factors other than move and rest may emerge (e.g., a desire or want for *stillness*, an outcome of  
144 meditation; (83). Consequently, to test these notions two studies were conducted with college-aged  
145 populations to psychometrically validate a questionnaire focused on cravings for movement/physical  
146 activity and rest/ sedentarism. In the first study, an exploratory factor analysis was conducted, and in the  
147 second study a confirmatory factor analysis took place.

## 148 Study 1

### 151 Introduction

152 The purpose of study 1 was to construct a scale for desires/wants to move and rest with good structural  
153 properties. It addresses the first three of the major hypotheses from above. Considerations are: 1) to align with  
154 theoretical models of desire to move / rest, 2) to keep the scale consistent with other validated scales of desire /  
155 craving. Study 1 involved the initial development of the scale and was highly structural: we generated items for  
156 the scale, administered the items to a test population, analyzed its factor structure and determined an appropriate  
157 number of scale items to occupy each dimension – trimming items when appropriate. We aimed to consider the  
158 4 essential properties of desires/cravings in this scale development: 1) desires for movement and rest reside on  
159 different dimensions as in contrast to opposite sides of the same pole, 2) they might be described as “wants” or  
160 simply “desires”, 3) desires vary in intensity, and may be completely absent (have a 0 point), 4) desires/wants  
161 have state-like traits; they are “in the present moment”.

### 163 Methods

164 **Participants.** A total of 402 college students from a public Midwestern university participated in the  
165 first study ( $M_{\text{age}} = 20.9$  years,  $SD = 3.2$ ). Self-reported gender data revealed that 61.6% of participants were  
166 male; whereas ethnicity data showed that 64.9% of the students classified themselves as Caucasian, 17.7% as  
167 African-American, 6% as Hispanic/Latino(a), 5% as Asian American, 4.7% as multiple ethnicities, and 1.5% as  
168 other/not listed. The academic rank of students was evenly distributed and ranged from a low of 23.1% for  
169 sophomores to 26.6% for seniors. Finally, most students (95%) were not athletes on varsity teams sponsored by

the university. All individuals signed an informed consent. The study was approved by the Institutional Review Board at Northern Illinois University, in accordance with the Declaration of Helsinki, protocol # HS13-0035.

**Instrumentation.** In addition to a demographic questionnaire, participants completed the Cravings for Rest and Volitional Energy Expenditure (CRAVE) consisting of 30 questions related to the urges/wanting or desire individuals had to perform various behaviors or activities. The questionnaire was further divided into two identical 15 question sections; the first of which asked participants to respond based on their want/desire to behave in the manners listed *over the past week* (WEEK), while the second was focused on individuals' want/desire to perform the behaviors *at this very moment* (“*Right now*”) (NOW) (26, 77). Questionnaire items for each section of CRAVE were developed by two researchers who have research experience in the areas of physical activity, kinesiology, and psychology of addictive behaviors – and were then checked for face validity by three other scholars (noted for being experts in the field of exercise psychology) from three different institutions. Inventory items were characterized by their dichotomous nature, in that seven items related to being physically active (e.g., want/desire to burn some calories; be physically active; exert my muscles, etc.) and eight items were sedentary behaviors (e.g., want/desire to just sit down, do nothing active, rest my body, etc.). Participants responded to each item on an 11-point Likert Scale ranging from 0 = not at all, to 10 = more than ever (36).

**Procedure.** After receiving IRB approval, two researchers from the byline reached out to professors at the selected university who instructed classes of more than 50 students (either by e-mail or phone) soliciting participation by briefly describing the nature of the present study and the approximately 10-minute time commitment required. Seven professors agreed to the request and upon the prearranged date/time one author traveled to each class for data collection. When addressing the students, the researcher explained the purpose/goals of the study, participants' rights if they elected to participate, and that all data were anonymous (e.g., no names collected). Students were then allowed time to ask any questions or opt out of participation (no student declined participation). Questionnaires were distributed by the researcher and these were completed at the beginning of each class. After completion, these were gathered by the same individual.

**Data Analysis.** Data were double-entered and cleaned and then screened for univariate outliers. In order to test the hypothesized 2-factor structure of the REST and MOVE items, exploratory factor analysis (EFA) was conducted to examine the salient number of factors. First, tests of assumptions were conducted (KMO and Bartlett's test for sphericity) to determine interrelations of items and factorability of data. Next, we determined to select a factor extraction method (i.e., maximum likelihood, principal axis) based on normality of data (15). The number of factors retained was specified by examining the scree plot and by using the Kaiser criterion (retaining all factors with Eigenvalues > 1.0) (15). It was decided a priori to use an oblique rotation (promax), which allows factors to correlate amongst each other, providing a more inclusive interpretation of the data (64). Factor loadings were examined with the criterion that a valid factor would have at least five items with loadings greater than .5 (15).

**Results.** Cases with missing data on any variables were dropped from further analyses, yielding a final sample size of 402 (26.8 cases per item in each analysis). Means (SD) for NOW items ranged from 3.14 (3.05) for “veg out” (vegetate) to 5.81 (2.87) for “move around”. For WEEK, they ranged from 2.77 (2.49) for “be motionless” to 7.33 (2.18) for “be physically active”. NOW and WEEK items (i.e., want to “move my body” *right now* versus *in the past week*) were correlated ( $r$  values=.30 to .61).

Initial tests of assumptions supported the factorability of the data for both Right now (NOW), KMO = .95, Bartlett's  $X^2(105) = 4887, p < .001$ , and Past week (WEEK) items, KMO = .89, Bartlett's  $X^2(105) = 3133, p < .001$ . In addition, 95.1% of correlations ( $r$ ) between items for NOW were above .3. For WEEK, this was 64%. Given these initial analyses, EFA was conducted on all items for both NOW and WEEK.

Data were normally distributed; therefore, maximum likelihood (ML) analysis was conducted with promax rotation. Based on scree plots and Kaiser's criterion, NOW had two factors, both with Eigenvalues above 1.0 (8.82 and 1.38, respectively). This explained 63.2% of the total variance when extracted. For NOW, factor 1 (named “Move”) contained 7 items with loadings all above .54. Factor 2 (named “Rest”) contained 8 items with loadings all above .57. However, for WEEK, there were 3 factors (Eigenvalues = 6.02, 2.42, 1.28)

219 explaining 56.3% of the variance after extraction. Factor 1 was similar to that for NOW (with the loading for  
220 item “move about” dropping to .40). The additional two factors separated the items for rest (factors 2 and 3  
221 received 6 and 2 items, respectively).

222 Communalities for all NOW items were  $>.57$  with the exception of “veg out” (vegetate), which was .23  
223 and “walk about”, which was .28. These communalities were also poor for WEEK (.17 and .15, respectively).  
224 All other communalities for WEEK were above .40, which is considered acceptable (15). “Veg out” (vegetate)  
225 and “walk about” had the smallest loadings with their respective factors as determined from the structure matrix  
226 (.47 and .53). Therefore, these two items were eliminated from the scale.

227 Re-running the EFA with just 13 items resulted in 2 factors for both NOW and WEEK, explaining 69%  
228 and 56.4% of the variance after extraction, respectively, with all loadings  $>.6$ . [see Additional file 1 for the final  
229 scale]. Correlations between Move and Rest factors were  $-.75$  and  $-.49$  for NOW and WEEK, respectively.  
230 Thus, the factor loading matrix for this final solution for NOW and WEEK is presented in Table 1. With the  
231 shortened version of the CRAVE, estimates of internal consistency (Chronbach’s Alpha) demonstrated there  
232 was good reliability of the subscales: .93 (move – now), .82 (move- past week), .89 (rest – now) and .87 (rest –  
233 past week).

234  
235

**Table 1 Factor loadings (FL) and communalities for Right now (NOW) and Past Week (Week) versions of CRAVE<sup>1</sup>**

| Item#                |                    | FL (Move)            | FL (Rest) | Communality |      |
|----------------------|--------------------|----------------------|-----------|-------------|------|
| NOW                  | 1                  | Move my body         | .803      | .740        |      |
|                      | 2                  | Be physically active | .885      | .844        |      |
|                      | 5                  | Burn some calories   | .778      | .569        |      |
|                      | 7                  | Expend some energy   | .871      | .788        |      |
|                      | 11                 | Exert my muscles     | .867      | .747        |      |
|                      | 15                 | Move around          | .704      | .705        |      |
|                      | 3                  | Do nothing active    |           | .681        | .654 |
|                      | 4                  | Just sit down        |           | .669        | .702 |
|                      | 8                  | Be still             |           | .758        | .745 |
|                      | 9                  | Be a couch potato    |           | .737        | .604 |
|                      | 12                 | Be motionless        |           | .907        | .712 |
|                      | 13                 | Lay down             |           | .752        | .549 |
|                      | 14                 | Rest my body         |           | .767        | .609 |
|                      | <b>Eigenvalues</b> |                      | 8.39      | 1.21        |      |
| <b>% of Variance</b> |                    | 62.0                 | 7.0       |             |      |
| WEEK                 | 1                  | Move my body         | .734      | .564        |      |
|                      | 2                  | Be physically active | .907      | .795        |      |
|                      | 5                  | Burn some calories   | .620      | .348        |      |
|                      | 7                  | Expend some energy   | .714      | .523        |      |
|                      | 11                 | Exert my muscles     | .781      | .609        |      |
|                      | 15                 | Move around          | .698      | .473        |      |
|                      | 3                  | Do nothing active    |           | .645        | .575 |
|                      | 4                  | Just sit down        |           | .740        | .572 |
|                      | 8                  | Be still             |           | .653        | .538 |
|                      | 9                  | Be a couch potato    |           | .764        | .649 |
|                      | 12                 | Be motionless        |           | .682        | .568 |
|                      | 13                 | Lay down             |           | .844        | .595 |
|                      | 14                 | Rest my body         |           | .803        | .520 |
|                      | <b>Eigenvalues</b> |                      | 5.90      | 2.29        |      |
| <b>% of Variance</b> |                    | 42.0                 | 14.4      |             |      |

<sup>1</sup> “Veg out (Vegetate)” and “Walk about” were removed from the final analysis leaving 13 items for the final scale (see text).

236  
237  
238  
239  
240  
241  
242  
243  
244  
245  
246  
247  
248  
249  
250  
251

### Discussion

In Study 1, a scale to measure wants/desires for movement and rest was created with 15 items and was later completed by over 400 participants. Results from this investigation supported all applicable hypotheses. Participants rated their desires to move and rest and being greater than 0 – in other words, they perceived these desires existed. As anticipated, items separated into two distinct factors – named move (6 items) and rest (7 items). Move and rest factors were moderately and inversely related. Reliability of the subscales was high, particularly when assessed “right now”. Overall, these results indicate that the scale has good initial psychometric properties and further evaluation and validity testing is appropriate.

### Study 2

#### Introduction

With structural considerations of the scale established, the purpose of study 2 was to confirm the structure as a model. Specifically, Study 2 directly tests hypotheses 1-3 and indirectly 4. A further objective was

to determine if there were any issues with discriminate validity (i.e., too much overlap between move and rest factors). As part of hypothesis 3, an aim was to assess the reliability of the scale. Secondary purposes of Study 2 were to explore how it varies by demographics (gender, race/ethnicity, age) and determine if there is an association of move/rest desires with a simple measure of exercise habit.

### Methods

**Participants.** In the second study, a total of 444 college students ( $M_{age} = 20.3$  years,  $SD = 2.9$ ) from a public Midwestern university participated. There was no overlap between studies for subjects. Self-report data from the demographic questionnaire highlighted the fact that 59.2% of the participants were female, 39.4% male, and 1.4% elected not to respond. The ethnic make-up of the sample was quite diverse; as specifically, 47.5% of the students classified themselves as Caucasian, 28.1% as African-American, 8.4% as Hispanic/Latino(a), 7% as Asian American, 0.7% as Native American, 7.4% as multiple ethnicities, and 0.9% as other/not listed. Student academic rank resembled a positive skewness, with freshman accounting for 28.7% of the sample, sophomores = 29.2%, juniors = 29.8%, seniors = 11.8%, and graduate students = 0.4%. Equivalent to Study 1, 95% of participants were not involved in varsity sports at the university; however, using the stages of change from the Transtheoretical Model to assess exercise engagement, 79.1% of students in the current study either exercised somewhat, exercised regularly for less than six months, or exercised regularly for more than six months. Finally, Body Mass Index (BMI) was also calculated, revealing that the second sample had a BMI of 25.0 ( $SD = 5.2$ ). All individuals signed an informed consent. The study was approved by the Institutional Review Board at Northern Illinois University, in accordance with the Declaration of Helsinki, protocol # HS13-0035.

**Instrumentation.** Similar to Study 1, participants completed a demographic questionnaire – with the only difference being the inclusion of three demographic questions addressing the Transtheoretical model (TTM) stages of change related to exercise involvement and height and weight to calculate BMI (46). Students then responded to the identical CRAVE questions used in Study 1.

**Procedure.** Following the procedures employed in the previous study, two researchers again contacted professors at the predetermined university who had enrollments of greater than 50 students in a class. (Important to note is that Study 2 was conducted in the semester immediately following data collection for Study 1; thus, researchers were careful to exclude potentially large classes based on course sequencing to exclude the possibility of recurring participants.) Eight professors agreed to the request for class participation and upon the prearranged date/time one researcher from the byline traveled to each class for data collection. Once again, the researcher explained the nature of the study, the anonymity of responses, allowed time for questions or for students to opt out of participation (no student declined participation), distributed the questionnaires for completion before class, and collected them upon completion.

**Data Analysis.** Reliability (internal consistency) was tested with Cronbach's Alpha. To test the relative fit of the CRAVE, confirmatory factor analysis (CFA) was used with the AMOS 21 software package (IBM, Chicago, IL). To adequately test each proposed model a chi-square ( $\chi^2$ ) test, goodness of fit index (GFI), adjusted goodness of fit index (AGFI), comparative fit index (CFI), root mean square error of approximation (RMSEA), and standardized root mean square residual (SRMR) were employed. These indices have been shown to be the most important when determining whether to support or reject hypotheses with CFA (41). To investigate the association between desire for energy expenditure as assessed by the CRAVE scale and TTM stages of change for exercise a one-way ANOVA and regression analyses were conducted. Stage of change was modeled as a continuous variable. In these analyses, the average across CRAVE subscale items was used as the dependent variable.

### Results

Of 444 participants, 426 people were included in the final analysis due to listwise deletion of participants lacking full data. Means (SD) for NOW items ranged from 3.06 (3.06) for “veg out” to 6.00 (3.31) for “rest my body” For WEEK, they ranged from 2.29 (2.38) for “be motionless” to 7.55 (2.09) for “be physically active”. NOW and WEEK items (i.e., want to “move my body” *right now* versus *in the past week*)



were correlated ( $r$ 's=.30 to .64,  $p<.001$ ). The CRAVE demonstrated good internal consistency. Reliability (Cronbach's Alpha) was .92 (move – now), .85 (move- past week), .90 (rest – now) and .82 (rest – past week). Based on the EFA analysis, the CFA was run with 13 items. All latent factors loaded strongly onto their respective items ( $> .7$  for NOW and  $>.5$  for WEEK). See Figure 1 for the NOW model. The correlation between Rest-Move factors was inverse and moderate to strong ( $r=-.75$  and  $r=-.53$  for the NOW and WEEK scales, respectively) but not so strong as to suggest a significant discriminant validity issue (where  $r>.85$ ).

The selected model fit indices all reached appropriate levels, suggesting an adequate fit of the present 2-factor model to the data (33, 41). See Table 2. It is important to note that the significant  $\chi^2$  result is expected due to the large sample size (41). Each of the four subscales showed adequate internal consistency (all Cronbach's  $\alpha >.86$ ).

Analyses conducted to determine the association between CRAVE constructs (13-item scale) and TTM stages of change suggest statistically significant differences in desire to move and rest according to exercise stage of change,  $F(4, 424) = 4.03-14.28$ ,  $p$  values  $< .003$ ,  $\eta^2$  values = .037-.10. To further probe the association, linear regression analysis revealed that stage of change predicted 6.5% of variance in desire to rest,  $\beta = -.26$ ,  $t(424) = -5.41$ ,  $p < .001$ , and 8.3% of variance in desire to move for NOW,  $\beta = .26$ ,  $t(424) = 5.57$ ,  $p < .001$ . Similarly for WEEK, it predicted 3% of variance in desire to rest,  $\beta = -.17$ ,  $t(424) = -3.63$ ,  $p < .001$ , and 11.2% of variance in desire to move,  $\beta = .31$ ,  $t(424) = 6.80$ ,  $p < .001$ . BMI did not predict any CRAVE subscale. Move NOW,  $F(1, 420) = 3.75$ ,  $p = .053$ ,  $\eta^2 = .01$ , and rest NOW,  $F(1, 420) = 3.68$ ,  $p = .056$ ,  $\eta^2 = .01$ , did not vary by gender (nor did WEEK). However, age did predict rest for NOW,  $\beta = -.19$ ,  $t(424) = -3.89$ ,  $p < .001$ ,  $R^2 = .04$ , but not movement NOW,  $\beta = .09$ ,  $t(424) = -1.83$ ,  $p = .068$ , nor rest or movement for WEEK.

**Table 2 Summary of fit statistics for the CRAVE for Right now (Now) and Past week (Week) versions**

| Model | $\chi^2$ | GFI | AGFI | CFI | NFI | RMSEA | SRMR |
|-------|----------|-----|------|-----|-----|-------|------|
| Now   | 123.80*  | .95 | .94  | .99 | .97 | .049  | .022 |
| Week  | 179.30*  | .94 | .91  | .96 | .94 | .067  | .044 |

*Note.* GFI = Goodness of Fit Index, AGFI = Adjusted Goodness of Fit Index, CFI = Comparative Fit Index, NFI = Normed Fit Index, RMSEA = Root Mean Square Error of Approximation, SRMR = Standardized Root Mean Square Residuals.

\* $p < .01$ .

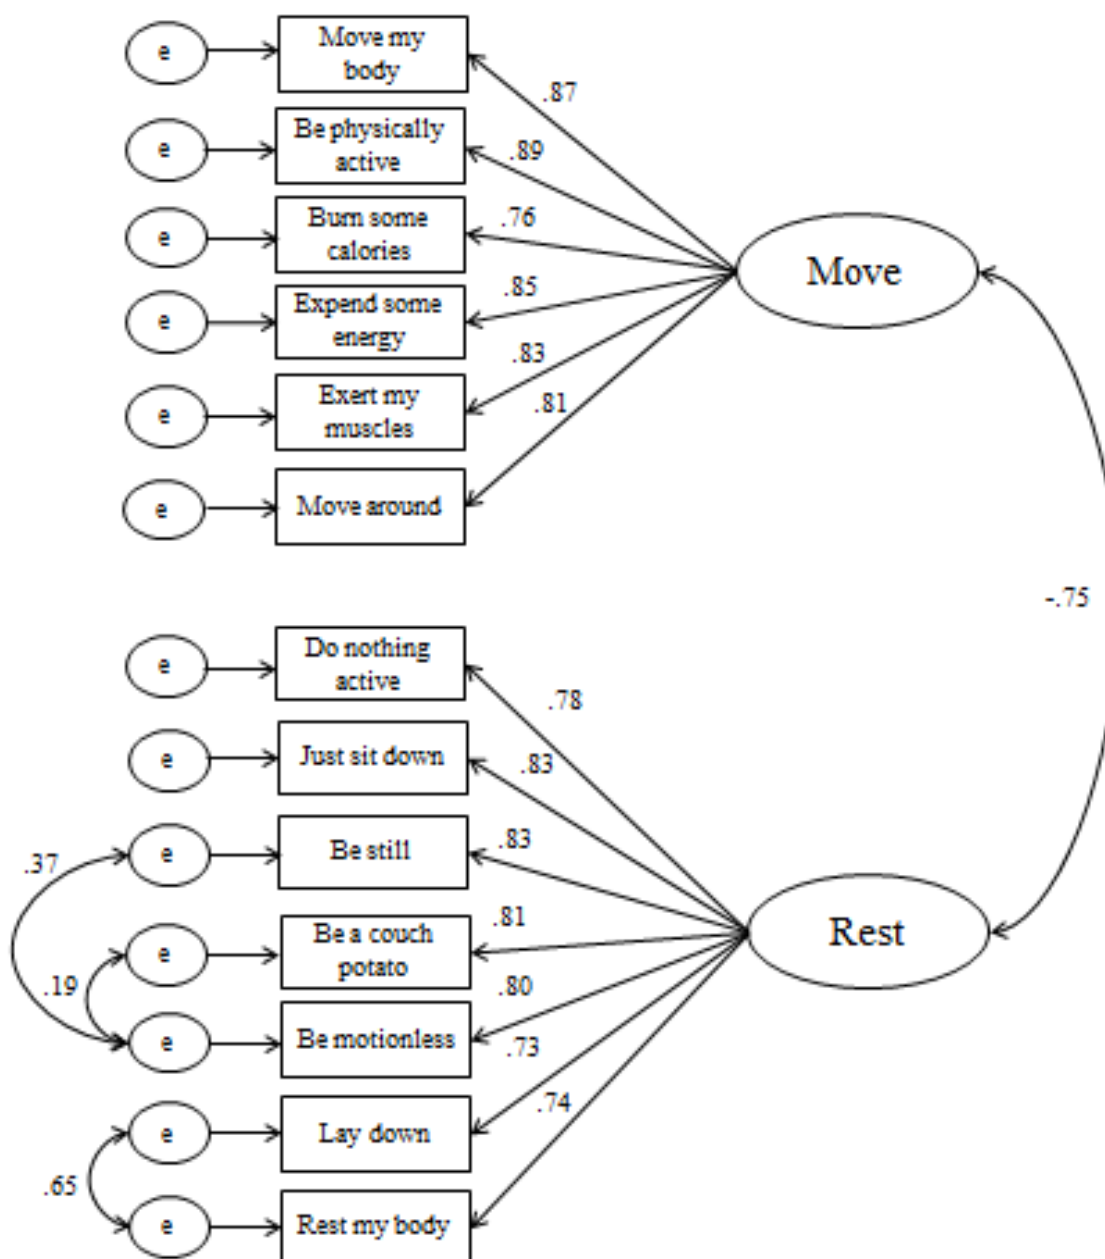

**Figure 1** Move and Rest factor loadings and inter-factor correlation for Right Now version of the CRAVE

326  
327  
328  
329  
330  
331  
332  
333  
334  
335

### Discussion

To further assess the psychometric properties of the CRAVE, 400+ new participants were administered the refined 13-item version of the scale. Hypotheses specific to this study were all supported. Participants rated their desires for movement and rest as greater than 0; in other words, they sensed that such desires existed. A confirmatory factor analysis supported the current model structure and move/rest factors were moderately and inversely related. Problems with discriminate validity were

not detected. Furthermore, reliability (internal consistency) of the subscales was good. The transtheoretical model (TTM) construct of stage-of-change for exercise predicted CRAVE subscales, explaining 8.3% and 6.5% of the variance in desires to move and rest (NOW), respectively. Other factors like BMI and gender did not predict CRAVE factors, but older age predicted less desire for rest. Results from Study 2 provide further evidence that the CRAVE has good psychometric properties and may be moved forward for further validity testing.

### Study 3

#### Introduction

The purpose of Study 3 was to investigate the reliability and internal consistency of the Move and Rest subscales of the CRAVE tool throughout a 2-year time span, as well as within the same day. Study 3 directly tested hypothesis 1-3 and 5. We hypothesized that the desire to move and rest scores would show greater reliability within the same day than across 2-years. These findings would suggest that the desire to move or rest has state-like properties rather than trait like properties. States can be defined as brief, temporary and easily influenced by changes in the external environment or internal milieu. Meanwhile, traits are stable, long-lasting and primarily emanate from within the person (14).

#### Methods

The CRAVE Scale was administered to 127 subjects (28.1±7.9, 57% non-Caucasian, 47% female) at 0, 6, 12, 18 and 24-months and at two time points (Point 1; Point 2) within the same testing session. CRAVE scores were collected before and after they completed a battery of self-report and structured interviews that were part of a larger study aimed at understanding the motivation to eat hyperpalatable foods (71). Statistical tests were performed using RStudio (Version 1.2.1335; R Foundation for Statistical Computing, Vienna, AT). Participants completed the CRAVE a variable number of times. Therefore, within subjects test-retest reliability was assessed with an intra-class correlation index generated with a random intercept model using the CorrMixed package (84). Test-retest reliability was assessed for within session (i.e. at the beginning and end of the testing session) and between sessions (i.e. at timepoints 0, 6, 12, 18, and 24 months) for Move and Rest subscores. Internal consistency was evaluated with Cronbach's Alpha. A secondary aim was to determine if CRAVE scores varied by gender by examining interactions in the LME. The study was approved by the Human Investigation Committee at the Yale School of Medicine, in accordance with the Declaration of Helsinki.

#### Results

**Table 3.** Means, standard deviations and correlations for Move and Rest Scores within the same test day (session points 1 and 2) across two years of follow up

| Time (months) | Move (Point 1) | Move (Point 2) | Move Scores (r) | Rest (Point 1) | Rest (Point 2) | Rest Scores (r) |
|---------------|----------------|----------------|-----------------|----------------|----------------|-----------------|
| 0             | 32.7 ± 15.2    | 35.9 ± 12.8    | 0.95            | 25.1 ± 13.9    | 20.9 ± 11.9    | 0.89            |
| 6             | 28.4 ± 12.9    | 26.7 ± 14.5    | 0.74            | 24.3 ± 14.2    | 24.3 ± 16.7    | 0.73            |
| 12            | 30.6 ± 13.7    | 28.8 ± 13.6    | 0.79            | 24.4 ± 14.6    | 23.9 ± 15.8    | 0.82            |
| 18            | 29.0 ± 13.0    | 29.4 ± 13.1    | 0.86            | 28.0 ± 15.9    | 24.5 ± 15.2    | 0.76            |
| 24            | 29.9 ± 11.6    | 28.0 ± 11.7    | 0.82            | 26.4 ± 16.0    | 25.4 ± 16.3    | 0.84            |

Participants completed the CRAVE, on average 5.4 (±3.04) times over 24 months. The CRAVE Scale showed greater test-retest reliability within each day than across 0, 6, 12, 18 and 24-months, as shown by Table

374 3. Strong correlations were found for within-day Move Scores correlations ( $r$ 's = .75-.95,  $p < .05$ ) and Rest Score  
375 correlations ( $r$ 's = .73-.89,  $p < .05$ ). Moderate correlations were found for Move scores across 0-24 months at  
376 Point 1 ( $r = .49$ ,  $p < .05$ ) and Point 2 ( $r = .40$ ,  $p < .05$ ) for point 2 ( $p$ -values  $< .05$ ). Further, moderate  
377 correlations were found for Rest Scores across 0-24 months at Point 1 ( $r = .37$ ,  $p < .05$ ) and Point 2 ( $r = .37$ ,  $p$   
378  $< .05$ )

379 Chronbach alpha tests at 0, 6, 12, 18 and 24 months were found to be 0.94-0.96 for Move at Point 1, 0.93-0.96  
380 for Move at Point 2, 0.90-0.95 for Rest at Point 1, and 0.86-0.96 for Rest at Point 2. No gender x time  
381 interactions were observed in the model.

### 382 Discussion

383 The results from Study 3 support the first hypothesis, which is that desires to move and rest have greater  
384 reliability within the same day than across 2-years. This was demonstrated by significantly greater associations  
385 between the urge to move and rest at two points within the same day compared to associations between these  
386 desires across multiple months. These findings suggest that the desire to move and rest have state-like  
387 properties rather than trait-like properties and are congruent with previous literature demonstrating that the  
388 desire to be physically active is not stable and can be affected by a myriad of factors, such as depression, mood,  
389 affect, anxiety, anger and stress (76). In accordance with this, Rowland (1998) has proposed that the desire to  
390 perform physical activity can be affected by factors such as personal desires, peer influences, and environmental  
391 conditions (62). Further, the results of Experiment 3 show that Move and Rest subscores have strong internal  
392 consistency, as demonstrated by high Cronbach alpha scores at each time the CRAVE was measured. A strength  
393 of this study is that it included 686 observations of the CRAVE scale, measured in 125 participants over 2  
394 years.

## 395 Study 4

### 396 Introduction

397 The purpose of Study 4 was to investigate changes in the desire to move and rest after a bout of maximal  
398 exercise. In addition, the hallmark of any urge or craving is change, sometimes rapidly. Study 4 directly tested  
399 hypothesis 3 and 4, and indirectly tested hypothesis 1 and 2. In particular, there is typically a reduction in desire  
400 once a sufficient quantity or intensity of a relevant stimulus is experienced, in other words, satiation is reached  
401 (57). Conversely, during deprivation, desires will increase. At sufficiently high levels of either satiation or  
402 deprivation, the experience will be tension. The same should hold true for desires for movement and rest. A  
403 maximal treadmill test provides an opportunity for both an excess of movement and the physiological  
404 deprivation of rest. We hypothesize that a bout of maximal exercise will satiate the desire to move and  
405 obviously deprive the body of respite, thereby leading to reductions in the desire to move and increases in the  
406 desire to rest (Hypothesis 4). We also hypothesize that these feelings will be related to, but distinct from  
407 sensation of physical and mental energy and fatigue (in accordance with Hypothesis 5).

### 408 Methods

409 Study 4 included twenty-one students ( $M_{age} = 20.5 \pm 1.4$ ; 58% female) who identified themselves as  
410 42.9% Caucasian, 19% Asian/Pacific Islander, 19% Hispanic, 14.3% multiple races and 4.8% Arab. The  
411 students were mainly undergraduates participating in physical activity classes at The University of Texas at  
412 Austin (Austin, TX, USA). The study was approved by the University of Texas at Austin's Institutional Review  
413 Board and informed consent was obtained from all participants.

414 Participants were advised to refrain from exercise for 48 hours prior to the laboratory testing session.  
415 During the testing session, participants underwent a maximal, graded treadmill test that was developed for this  
416 population of college students. In this protocol, the grade or speed of the exercise was increased every minute  
417 for the first 10 minutes and then speed only was increased every minute until participants reached volitional  
418 fatigue. Once volitional fatigue was reached, speed and grade were reduced to provide the participant with a 5-  
419 minute cooldown walk.  
420  
421

The speed or CRAVE, physical energy, physical fatigue, mental energy and mental fatigue were measured one minute prior to starting the treadmill test, as well as two minutes after completing the test. Physical and mental fatigue and energy were measured pre- and post-exercise using Visual Analogue Scales developed and validated by O'Connor (27, 50). Respondents placed a mark on a standard 10-cm line. Examples of anchors include, "I have no energy" to "Strongest feelings of energy ever felt". Statistical tests were conducted using SPSS (Version 25; IBM SPSS Statistics Software, Chicago, IL, USA). Paired t-tests were used to compare pre- and post-CRAVE scores. Pearson's correlations were used to assess relationships between all CRAVE scores, mental fatigue, mental energy, physical fatigue, and physical energy.

## Results

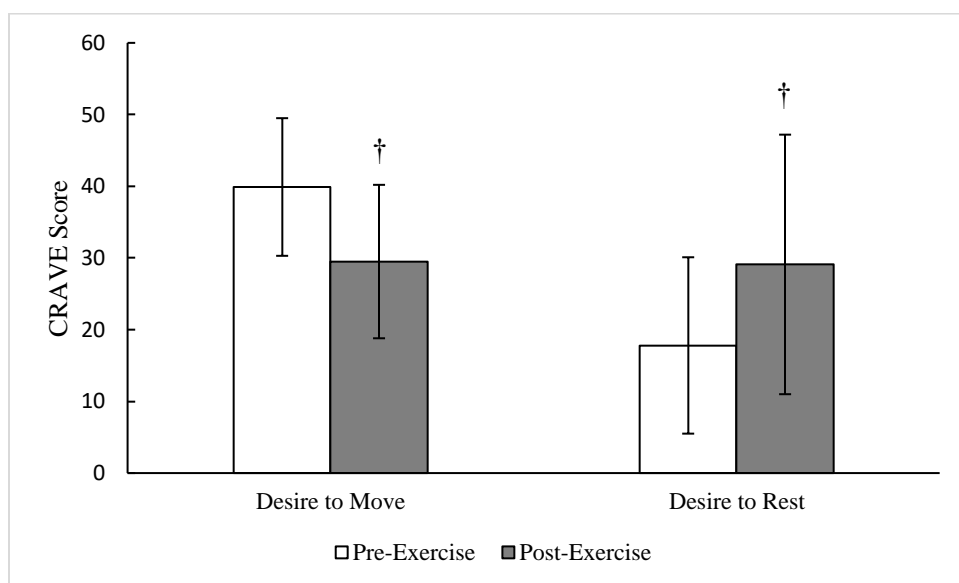

**Figure 2.** Desire to move and rest pre and post-treadmill exercise test  
† Indicates significant difference from pre- to post-exercise test ( $p < .05$ )

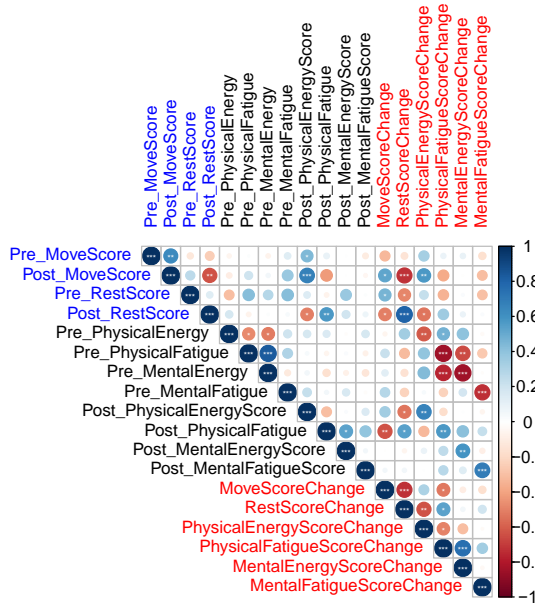

**Figure 3.** Pearson correlation matrix between pre- and post-treadmill test move and rest scores, physical energy, physical fatigue, mental energy and mental fatigue scores, and change in those scores.

\* denotes  $p < .05$ ; \*\* denotes  $p < .01$ ; \*\*\* denotes  $p < .001$

On average, participants took  $13.5 \pm 2.0$  min to reach volitional fatigue on the treadmill test, reached a maximum heart rate of  $194.7 \pm 10$  bpm and reported a Rating of Perceived Exertion (RPE, Borg Scale) of  $18.3 \pm 1.0$ . Desire to move significantly decreased from pre- to post-treadmill test ( $39.9 \pm 9.6$  vs.  $29.5 \pm 10.7$ ,  $p < 0.01$ ), as shown in Figure 2. Conversely, desire to rest significantly increased from pre- to post-treadmill test ( $17.8 \pm 12.3$  vs.  $29.1 \pm 18.1$ ,  $p < 0.01$ ), as shown in Figure 2. Baseline desire to move was significantly associated with desire to move post-treadmill ( $r = 0.63$ ,  $p = .002$ ). Baseline desire to rest was significantly associated with the change in move ( $r = 0.53$ ,  $p = .014$ ) and change in rest ( $r = -.48$ ,  $p = .027$ ). In addition, change in desire to move was inversely associated with change in desire to rest ( $r = -.73$ ,  $p = .002$ ).

Figure 3 shows the results of all correlation tests conducted. Baseline desire to move was significantly associated with the post-treadmill test physical energy score ( $r = .45$ ,  $p = .041$ ). Change in desire to move had a negative association with change in physical fatigue ( $r = -.52$ ,  $p = .019$ ) but not with change in physical energy ( $r = .31$ ), mental energy ( $r = -.10$ ) or mental fatigue ( $r = -.17$ ). Change in rest had a significant inverse correlation with change in physical energy ( $r = -.64$ ,  $p = .003$ ) and a positive correlation with change in physical fatigue ( $r = .53$ ,  $p = .016$ ). However, it was not correlated with change in either mental energy or fatigue.

### Discussion

It was shown that desires to move and rest change with a maximal exercise stimulus. In support of the hypothesis, it was found that a bout of exercise satiates the desire to move and places the body in a state of physiological deprivation for rest. This was demonstrated with a decrease in desire to move and an increase in desire to rest from pre- to post-treadmill test. Further, these findings show that perceived physical fatigue has a positive association with the desire to rest, and an inverse association with the desire to move. Additionally, perceived physical energy had a negative association with the desire to rest. These findings provide convergent validity of the scale. They also support the use of the CRAVE Scale as a tool that is sensitive to changes in the desire to move and rest before and after exercise. A limitation to this study is that it is not known whether participants honored the request to refrain from exercise for 48 hours, therefore it is unknown if the desire to move was sufficiently built up during this time. Also, the current study did not assess positive and negative affect – other factors that likely relate to desires to move but not strongly (87). In a future study, researchers should examine changes in the desire to move and rest with a more ecologically valid exercise protocol, in a

473 real-life exercise setting such as a full resistance training workout, sports game, or a 2-mile run, etc. Future  
474 studies should also track recovery of desires for a sufficient period after they have been altered (e.g., over 30  
475 minutes – 2 hours or more).

## 476 Study 5

### 477 Introduction

478 In Study 4, we investigated changes in the desire to move or rest in response to a bout of maximal  
479 exercise. In contrast, the purpose of Experiment 5 was to assess changes in the desires to move or rest in  
480 response to sedentary behavior. Study 5 directly tested hypothesis 3 and 4, and indirectly tested hypothesis 1  
481 and 2. Desires to move and rest should vary by deprivation or satiation of these feelings (57). Consequently,  
482 restricting movement, particularly in a group of individuals more likely to move (young adults) should result in  
483 increased desires to move. Conversely, satiating the need to rest through sedentary behavior should result in  
484 lesser of these desires. As the sedentary behavior is prolonged, the desire to move will build up and be felt as a  
485 type of tension, perhaps analogous to appetite (19, 45, 62). Based on these premises, we hypothesize that  
486 prolonged sitting during a university lecture period would increase the desire to move and decrease the desire to  
487 rest (Hypothesis 4). It is also proposed that desire to move/rest will be related to, but distinct from, perceptions  
488 of energy, fatigue, tension and calmness (in accordance with Hypothesis 5). A final aim was to determine the  
489 internal consistency and test-retest reliability of the CRAVE scale (supporting Hypothesis 3).

### 491 Methods

492 The CRAVE Scale and Thayer Activation-Deactivation (AD) Checklist (78) were administered to 41  
493 students (mean age  $22.5 \pm 5.1$  years; 26.8% non-Caucasian; 24.4% female) before, during and at the end of a 50-  
494 minute lecture. Students quietly sat, listened and took notes while the instructor delivered a PowerPoint  
495 presentation. The AD Checklist consists of 20 items answered on a 1-10 Likert Scale and measures perceived  
496 energy, tiredness, tension and calmness; this measure was only assessed pre-lecture. Lectures were at either  
497 9AM, 12PM or 3PM. Statistical tests were conducted using RStudio (Version 1.2.1335; R Foundation for  
498 Statistical Computing, Vienna, AT) and SPSS (Version 25; IBM SPSS Statistics Software, Chicago, IL, USA).  
499 A linear mixed effects model was used to compare pre- and post-lecture CRAVE Scores. Correlations were  
500 calculated to evaluate CRAVE and AD Checklist relationships. A one-way ANOVA was used to assess changes  
501 in both CRAVE and AD Checklist scores over time. Reliability indices were assessed with Cronbach's Alpha  
502 and inter-class correlations. The study was approved by the Institutional Review Board at Western Illinois  
503 University, in accordance with the Declaration of Helsinki.

### 504 Results

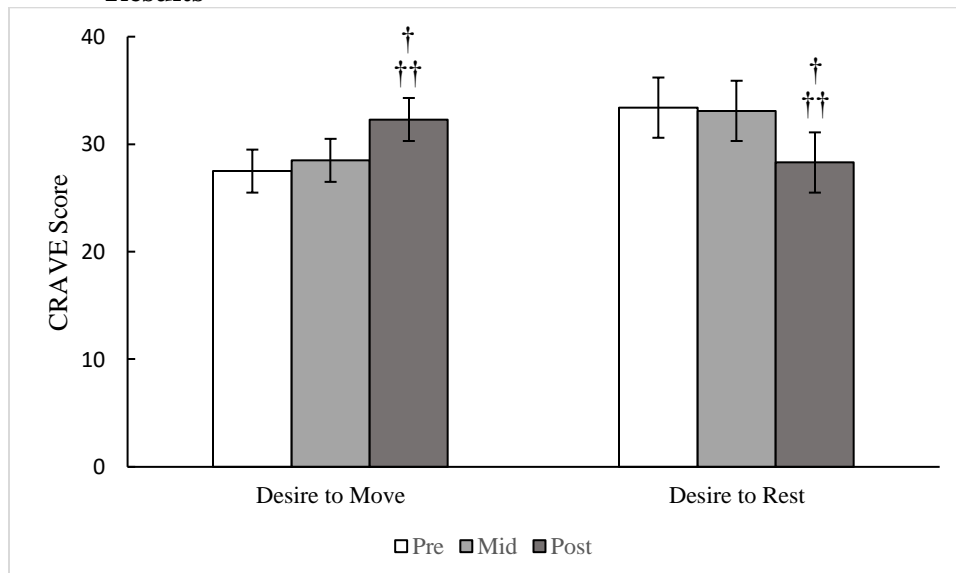

**Figure 3.** Desire to move and rest pre-, mid- and post-lecture

† Indicates significant difference from pre-lecture ( $p < .05$ )

†† Indicates significant difference from mid-lecture ( $p < .05$ )

It was found that the desire to move was significantly higher post-lecture compared to pre-lecture ( $32.2 \pm 2.0$  vs.  $27.5 \pm 2.0$ ,  $p = 0.007$ ) and higher than mid-lecture ( $28.5 \pm 2.0$ ,  $p = .034$ ), as shown in Figure 4. On the other hand, the desire to rest was significantly lower post-lecture compared to pre-lecture ( $28.3 \pm 2.8$  vs.  $33.4 \pm 2.8$ ,  $p = .016$ ) and lower than mid-lecture ( $33.1 \pm 2.8$ ,  $p = .019$ ), as shown in Figure 2. Cronbach alpha coefficients were calculated for pre-, mid- and post-lecture, which were found to be 0.90, 0.94, 0.93 for the desire to move, respectively, and 0.89, 0.94, 0.93 for the desire to rest, respectively. Inter-class correlations were calculated for the desire to move ( $ICC = .85$ ) and the desire to rest ( $ICC = .90$ ).

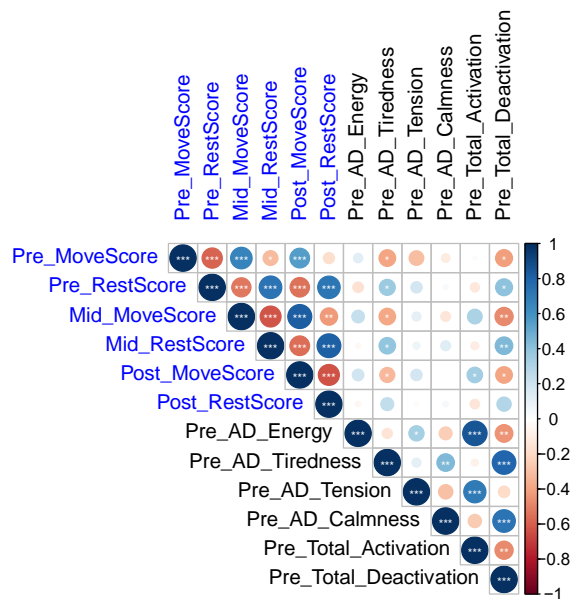

**Figure 5.** Pearson correlation matrix between pre, mid-, and post-lecture move and rest scores, energy, tiredness, tension, calmness, total activation and total deactivation

\* denotes  $p < .05$ ; \*\* denotes  $p < .01$ ; \*\*\* denotes  $p < .001$

The desire to move pre- and mid-lecture were similar at different times of the day. The post-class desire was significantly higher at 3PM compared to 9AM ( $44.0 \pm 16.6$  vs.  $28.11 \pm 12.2$ ,  $p = .019$ ). There were no differences in desire to rest based on time of day. Desire to move at baseline was significantly associated with energy ( $r = .38$ ,  $p = .018$ ) and calmness ( $r = -0.47$ ,  $p = .003$ ), as shown by the correlation matrix in Figure 5. Desire to rest at baseline was significantly associated with energy ( $r = -0.38$ ,  $p = 0.026$ ) and tiredness ( $r = 0.48$ ,  $p = 0.003$ ). Tension was unrelated to either move or rest.

**Discussion**

It was found that the desires to move and rest change throughout the course of a period of sedentary behavior. In support of our hypothesis, it was found that prolonged sitting during a university lecture increased the desire to move and decreased the desire to rest. Moreover, these findings show that the CRAVE Scale is a tool that is sensitive to changes in the desire to move and rest before and after sedentary behavior, providing support for the construct validity of this instrument. The CRAVE also demonstrated good reliability. A strength of this investigation was that the observation periods were standardized across the sedentary period (pre-, mid- and post-lecture), and the data was collected at multiple times during the day. However, students did not return to be observed at multiple hours of the day; therefore, within-subject difference at each time of day could not be assessed. Moreover, no data was collected in the evening or at awakening. Consequently, this methodology is limited in the extent to which it can ascertain the influence time of day has on changes in the desire to move or rest.



## General Discussion

The main objective of the current investigation was to create and validate an instrument to measure urges and desire (wants) for movement and rest. An exploratory factor analysis revealed that a two-factor solution for movement (6 items) and rest (7 items) desires produced the best fit. These two factors were moderately to strongly correlated, suggesting that factors were related but not completely overlapping. Moreover, a confirmatory factor analysis performed on a separate sample confirmed these findings. Results for Right Now (NOW) and Past Week (WEEK) scales were related but produced slightly different estimates, indicating that this instrument captures a construct that likely has state-like properties. The state-like nature of the CRAVE was later evidenced by the fact that the scale was more closely correlated when observations were separated by just a few hours, compared to intervals of 6 months or more. This data also served to demonstrate the reliability of the CRAVE subscales, which was high for both studies. The CRAVE did not change much with a period of sitting and listening; conversely, the CRAVE was sensitive to change when participants partook in a maximal treadmill test. Wants/desires for rest greatly increased and desires for movement decreased.

The current data indicate that desires for movement and rest likely fall on two different, but related factors. In other words, the desire for movement is not simply *the lack of desire* for rest, or sedentary behavior, which would imply that the two desires are opposite poles on the same dimension. A two-factor distinction mirrors current thinking about physical activity and sedentarism, as introduced above (51, 53). Similarly, it may be possible that one has high desire for both rest and movement simultaneously, or low desire for both as well. Being high on desire for movement does not necessitate a low level of desire for rest; as in fact, the two may be in conflict. From a neurological perspective, regulation of impulses in the brain for EE and sedentary behavior appears to fall on two distinct corticostriatal pathways, which Beeler and colleagues call “Go” and “No Go” (8). Brain systems responsible for sensations of reward and sensations of pain regulate both aversion to movement and/or “craving” for PA, and these differ from systems responsible for desire for rest (7). This is parsimonious with a vast literature base describing function of the sympathetic and parasympathetic nervous systems (56). Thus, desires for EE and rest likely operate dichotomously and independently, similarly to the dual system models proposed for energy and fatigue (50), activation/deactivation (79) and positive and negative affect (85).

Desires, by definition, have state-like qualities (52), and this appears to be true for desires for movement and rest. Unfortunately, the current study was not designed to investigate fluctuations in desires across time, which would have been a stronger test of our hypothesis that movement and rest desires capture a motivational state. However, NOW and WEEK versions of the CRAVE subscales did confirm that these versions were related but distinctly different. This suggests that participants were able to differentiate their urge/desires at the present moment versus their typical desires over a much longer period of time. As a state, one might surmise that movement and rest desires vary similarly to state measures of affect (i.e., arousal, energy and fatigue). Future research should aim to understand how desires to move and rest relate to and differentiate from arousal, energy, fatigue and other components of affect, providing evidence of construct validity. Likewise, it should be determined how these factors change over time. It is possible that desires / wants for rest and movement may fluctuate diurnally and may further undulate with feedings, sleep, and physical activity (79). It would be useful to observe changes in these constructs before and after an acute bout of exercise, and to determine what other factors affect movement desires, such as environmental cues (e.g., lighting, music), social interactions, et cetera (52).

On the other hand, one might construe that urge and desires for activity and sedentary behaviors are stable and/or may be highly influenced by intra-individual traits. Substantial individual differences have been noted not only in physical activity, movement and non-exercise activity thermogenesis

(NEAT) (42) but also in the acute aversive and rewarding effects of physical activity (7). Such a trait would possess a strength that is normally distributed throughout the population and expressed most strongly in young age (21). Some children demonstrate more active temperaments, kinetic personalities (i.e., hyperactivity), or a *predilection* for physical activity while others are ostensibly more lethargic (25), traits that may persist into adulthood (1, 88).

Regulation of urges and desire for movement and rest are not well understood. However, individual variation is predicted by differences in brain structure and activation and is greatly influenced by genetics (21), which exerts wide influence on processes related to rewards and pain sensation (16). Those who “crave activity” likely have rewards systems that activate in response to physical activity and exercise (7, 16). The neurotransmitter dopamine is implicated in systems responsible for reward and locomotion in the nucleus accumbens and other parts of the brain (9, 48, 65). Evidence from rodent models conclude that the frequency and vigor of locomotion is triggered by affect related motivations (e.g., hunger, reproduction) and more generally caused by changes in internal arousal, which is regulated by the dorsal striatum, forming the input nuclei of the basal ganglia (23, 55, 59). One prime candidate is *nescent helix-loop-helix 2* (NHLH2), whose activity in the brain may regulate motivation to exercise through melanocortin signaling or A-endorphin processing (22). Other candidates could include the dopamine 2 receptor (DRD2) and GABRG3 genes (16). While regions of the brain associated with movement have been partially mapped, no evidence has been found for neural circuitry associated with fear or dread of movement (for a review, see (6)). This points to a limitation within the current study. We aimed to assess and model desires/wants for movement but not dread or aversion for movement as highlighted by the AHBf(87) and further conceptualized in an article published in this Special Issue of the journal (**Citation intentionally omitted**).

To understand these processes, future studies should aim to assess movement and rest desires in a variety of populations. The current study was limited to young adults completing undergraduate education. Ekkekakis’ (17) synopsis of literature from the mid-to-late 1800s (3-5) submits that while desire is especially strong for the young and those well-trained, it declines with age and deconditioning. One might expect that training status and habituation to physical activity would have an impact on desires for movement. For instance, sedentary and low-active individuals are more likely to experience displeasure during exercise even when it’s low intensity (86). Furthermore, regular exercisers experience greater improvements in mood than non-exercisers (29) and highly active individuals report that enjoyment is the primary motive of exercise (74). Indeed, in the current analysis TTM stage-of-change for exercise did predict desires, explaining a significant amount of variance in the current data. However, it would be useful to determine whether those with higher movement desires actually have more EE from exercise or non-exercise sources (e.g., NEAT, SPA) (42) and whether these change over time with chronic training. Movement desires, or what has been termed “appetence”, is magnified with exercise addiction and anorexia (19). Conversely, the desire to move may decrease with burnout and overtraining, which have depression-like symptoms. Movement and rest wants / desires likely are altered by conditions like acute and chronic illness (72), depression (psychomotor retardation(13), and distress (psychomotor agitation) (40), which may modify incentive salience for movement (10, 59, 61). As early as 1896, Stedman noted that with nervous and mental disease “the natural conscious *craving* for exercise is lost” (73). Thus, it is likely but speculative that desires vary over time and across populations, situations and conditions.

Future research should also address how these desires actually motivate and spur behaviors. Desires vary in magnitude, focal attention and their effect on working memory, which results in differential implications for a wide swath of behaviors (61). Intense desires, manifested as psychophysiological cravings and urges, strongly predict future behavior, such as overeating, bingeing on alcohol, overconsumption of caffeine, excessive engagement in sexual activity, smoking of cigarettes and other behaviors (39, 69, 82). As demonstrated by the Dynamical Model of Desire (31), wants that emerge into focal attention in working memory often instigate active pursuit of that desire. Weak,

transient desires, on the other hand, may go unnoticed, overshadowed by other desires, and may not result in any changes in behavior (45, 52). However, desires not in focal attention may still motivate behaviors with impelling force through an automatic route of influence. This may be the case for movement, the desire of which is often of a weaker nature, has a smaller demand for attention and exerts less influence on working memory than food or sleep. Nevertheless, it's possible that desires for EE may play a key role in influencing movement behaviors and may help to explain compensatory responses to exercise (19).

### Conclusions

While models exist for cravings/desires for exercise, the systematic investigation of these constructs is still in its infancy, having been impeded by a lack of instrumentation. We developed a novel measurement tool to gauge the want / desire of movement and rest in 2 large groups of undergraduate students tested cross-sectionally, 2 groups tested multiple times per session and 1 group of community-dwelling adults assessed over a 2-year time period. Factor analyses determined that this instrument has good psychometric properties, distinguishing between desires for movement and rest. It is also sensitive to the state-like nature of the construct. Small changes were observed over a lecture period and large changes were observed with a bout of maximal exercise. Such a tool may be a valuable resource for researchers interested in psychological desires and how they relate to changes in physical activity and sedentary behaviors in the present moment. Future work should determine how these relate to facets of energy expenditure and whether satiating desires for movement and/or resisting desires for rest results in greater movement behavior.

### Acknowledgements

Marcus Kilpatrick, Ph.D. (University of South Florida) and Justin B. Moore, Ph.D. (Wake Forest School of Medicine) provided thoughtful comments on this project in its early stages. We would also like to acknowledge Samantha Brown (Icahn School of Medicine) for assistance with data management and graduate students from Teachers College, Columbia University, who provided many provoking insights.

### Funding

This work was supported in part by the National Institute of Diabetes and Digestive and Kidney Diseases/National Institutes of Health grant R01- DK099039 and the National Institutes of Health Roadmap for Medical Research Common Fund Grants UL1-DE019586, UL1-RR024139 (Yale Clinical and Translational Science Award), and the PL1-DA024859. GA is supported by a fellowship from the Office of Academic Affiliations at the United States Veterans Health Administration.

688 **References**

- 689 1. Anderson SE, Bandini LG, Dietz WH, Must A. Relationship between temperament, nonresting energy  
690 expenditure, body composition, and physical activity in girls. *International Journal of Obesity*. 2004;28(2):300-  
691 6.
- 692 2. Aristotle. *De Anima* iii. Raleigh, N.C.: Generic NL Freebook Publisher.
- 693 3. Bain A. *The senses and the intellect*. London: John W. Parker & Son; 1855.
- 694 4. Baldwin JM. *Handbook of Psychology: Feeling and Will*. New York: Henry Holt & Company; 1891.
- 695 5. Baldwin JM. *Mental development in the child and the race: Methods and processes*. New York:  
696 Macmillan; 1894.
- 697 6. Barke A, Baudewig J, Schmidt-Samoa C, Dechent P, Kröner-Herwig B. Neural correlates of fear of  
698 movement in high and low fear-avoidant chronic low back pain patients: an event-related fMRI study. *Pain*.  
699 2012;153(3):540-52.
- 700 7. Bauman AE, Reis RS, Sallis JF, Wells JC, Loos RJJ, Martin BW, et al. Correlates of physical activity:  
701 why are some people physically active and others not? *Lancet*. 2012;380(9838):258-71.
- 702 8. Beeler JA, Frazier CRM, Zhuang X. Putting desire on a budget: dopamine and energy expenditure,  
703 reconciling reward and resources. *Frontiers in integrative neuroscience*. 2012;6:49.
- 704 9. Beninger RJ. The role of dopamine in locomotor-activity and learning. *Brain Research Reviews*.  
705 1983;6(2):173-96.
- 706 10. Berridge KC, Robinson TE. What is the role of dopamine in reward: hedonic impact, reward learning, or  
707 incentive salience? *Brain Res Brain Res Rev*. 1998;28(3):309-69.
- 708 11. Bohn MJ, Krahn DD, Staehler BA. Development and initial validation of a measure of drinking urges in  
709 abstinent alcoholics. *Alcohol Clin Exp Res*. 1995;19(3):600-6.
- 710 12. Brand R, Ekkekakis P. Affective-Reflective Theory of physical inactivity and exercise. *German Journal*  
711 *of Exercise and Sport Research*. 2018;48(1):48-58.
- 712 13. Buyukdura JS, McClintock SM, Croarkin PE. Psychomotor retardation in depression: Biological  
713 underpinnings, measurement, and treatment. *Progress in Neuro-Psychopharmacology & Biological Psychiatry*.  
714 2011;35(2):395-409.
- 715 14. Chaplin WF, John OP, Goldberg LR. Conceptions of states and traits: dimensional attributes with ideals  
716 as prototypes. *J Pers Soc Psychol*. 1988;54(4):541-57.
- 717 15. Costello AB, Osborne JW. Best practices in exploratory factor analysis: Four recommendations for  
718 getting the most from your analysis. *Practical Assessment, Research & Evaluation*. 2005;10(7).
- 719 16. de Geus EJ, de Moor MH. Genes, exercise, and psychological factors. In: Bouchard C, Hoff man EP,  
720 editors. *Genetic and molecular aspects of sports performance*. Oxford: Blackwell Publishing; 2011. p. 294-305.
- 721 17. Ekkekakis P. Pleasure from the exercising body: Two centuries of changing outlooks in psychological  
722 thought. In: Ekkekakis P, editor. *Routledge Handbook of Physical Activity and Mental Health*. New York:  
723 Routledge; 2013. p. 35-56.
- 724 18. Ekkekakis P. Postscript. In: Ekkekakis P, editor. *Routledge Handbook of Physical Activity and Mental*  
725 *Health*. New York, NY: Routledge; 2013.
- 726 19. Ferreira A, Lamarque S, Boyer P, Perez-Diaz F, Jouvent R, Cohen-Salmon C. Spontaneous appetite  
727 for wheel-running: a model of dependency on physical activity in rat. *European Psychiatry*. 2006;21(8):580-8.
- 728 20. Garcia-Borreguero D, Stillman P, Benes H, Buschmann H, Chaudhuri KR, Rodriguez VMG, et al.  
729 Algorithms for the diagnosis and treatment of restless legs syndrome in primary care. *Bmc Neurology*.  
730 2011;11:12.
- 731 21. Garland T, Schutz H, Chappell MA, Keeney BK, Meek TH, Copes LE, et al. The biological control of  
732 voluntary exercise, spontaneous physical activity and daily energy expenditure in relation to obesity: human and  
733 rodent perspectives. *Journal of Experimental Biology*. 2011;214(2):206-29.
- 734 22. Good DJ, Coyle CA, Fox DL. Nhlh2: A basic helix-loop-helix transcription factor controlling physical  
735 activity. *Exercise and Sport Sciences Reviews*. 2008;36(4):187-92.

- 736 23. Haber SN, Calzavara R. The cortico-basal ganglia integrative network: the role of the thalamus. *Brain*  
737 *Res Bull.* 2009;78(2-3):69-74.
- 738 24. Hausenblas HA, Downs DS. Exercise dependence: a systematic review. *Psychology of Sport and*  
739 *Exercise.* 2002;3(2):89-123.
- 740 25. Hay JA. Adequacy in and predilection for physical activity in children. *Clinical Journal of Sport*  
741 *Medicine.* 1992;2(3):192-201.
- 742 26. Heishman SJ, Evans RJ, Singleton EG, Levin KH, Copersino ML, Gorelick DA. Reliability and validity  
743 of a short form of the Marijuana Craving Questionnaire. *Drug and Alcohol Dependence.* 2009;102(1-3):35-40.
- 744 27. Herring MP, O'Connor PJ. The effect of acute resistance exercise on feelings of energy and fatigue.  
745 *Journal of Sports Sciences.* 2009;27(7):701-9.
- 746 28. Hoffman GJ, Lee J, Mendez-Luck CA. Health Behaviors Among Baby Boomer Informal Caregivers.  
747 *Gerontologist.* 2012;52(2):219-30.
- 748 29. Hoffman MD, Hoffman DR. Exercisers achieve greater acute exercise-induced mood enhancement than  
749 nonexercisers. *Archives of Physical Medicine and Rehabilitation.* 2008;89(2):358-63.
- 750 30. Hofmann W, Baumeister RF, Forster G, Vohs KD. Everyday Temptations: An Experience Sampling  
751 Study of Desire, Conflict, and Self-Control. *Journal of Personality and Social Psychology.* 2012;102(6):1318-  
752 35.
- 753 31. Hofmann W, Van Dillen L. Desire: The new hot spot in self-control research. *Current Directions in*  
754 *Psychological Science.* 2012;21(5):317-22.
- 755 32. Hofmann W, Vohs KD, Baumeister RF. What People Desire, Feel Conflicted About, and Try to Resist  
756 in Everyday Life. *Psychological Science.* 2012;23(6):582-8.
- 757 33. Hu LT, Bentler PM. Cutoff Criteria for Fit Indexes in Covariance Structure Analysis: Conventional  
758 Criteria Versus New Alternatives. *Structural Equation Modeling-a Multidisciplinary Journal.* 1999;6(1):1-55.
- 759 34. Hutchinson JC, Sherman T, Davis L, Cawthon D, Reeder NB, Tenenbaum G. The influence of  
760 asynchronous motivational music on a supramaximal exercise bout. *International Journal of Sport Psychology.*  
761 2011;42(2):135-48.
- 762 35. Iqbal N, Lambert T, Masand P. Akathisia: Problem of history or concern of today. *Cns Spectrums.*  
763 2007;12(9):1-+.
- 764 36. Jastreboff AM, Sinha R, Lacadie C, Small DM, Sherwin RS, Potenza MN. Neural Correlates of Stress-  
765 and Food Cue-Induced Food Craving in Obesity Association with insulin levels. *Diabetes Care.*  
766 2013;36(2):394-402.
- 767 37. Jung Y, Hassan A, St Louis EK, Robertson CE. Restless mouth syndrome. *Neurol Clin Pract.*  
768 2017;7(3):e29-e30.
- 769 38. Katula JA, Sipe M, Rejeski WJ, Focht BC. Strength training in older adults: an empowering  
770 intervention. *Med Sci Sports Exerc.* 2006;38(1):106-11.
- 771 39. Kemps E, Tiggemann M. Competing Visual and Olfactory Imagery Tasks Suppress Craving for Coffee.  
772 *Experimental and Clinical Psychopharmacology.* 2009;17(1):43-50.
- 773 40. Kessler RC, Andrews G, Colpe LJ, Hiripi E, Mroczek DK, Normand SL, et al. Short screening scales to  
774 monitor population prevalences and trends in non-specific psychological distress. *Psychol Med.*  
775 2002;32(6):959-76.
- 776 41. Kline RB. Principles and practice of structural equation modeling. 3rd ed. New York: Guilford Press;  
777 2010.
- 778 42. Levine JA, Lanningham-Foster LM, McCrady SK, Krizan AC, Olson LR, Kane PH, et al.  
779 Interindividual variation in posture allocation: Possible role in human obesity. *Science.* 2005;307(5709):584-6.
- 780 43. Levitin DJ, Grahn JA, London J. The Psychology of Music: Rhythm and Movement. *Annu Rev Psychol.*  
781 2018;69:51-75.
- 782 44. Lewin K. Field theory in social science. 1951.
- 783 45. Loewenstein G. Out of control: Visceral influences on behavior. *Organizational Behavior and Human*  
784 *Decision Processes.* 1996;65(3):272-92.

- 785 46. Marcus BH, Rakowski W, Rossi JS. Assessing motivational readiness and decision-making for exercise.  
786 Health Psychology. 1992;11(4):257-61.
- 787 47. Matthews TE, Witek MAG, Heggli OA, Penhune VB, Vuust P. The sensation of groove is affected by  
788 the interaction of rhythmic and harmonic complexity. PLoS One. 2019;14(1):e0204539-e.
- 789 48. Mogenson GJ, Jones DL, Yim CY. From motivation to action- Functional interface between the limbic  
790 system and the motor system. Progress in Neurobiology. 1980;14(2-3):69-97.
- 791 49. Nascimento DS. Desire and cognition in Aristotle's theory of the voluntary movements of animal  
792 locomotion. Filosofia Unisinos. 2017;18:70-8.
- 793 50. O'Connor PJ. Evaluation of four highly cited energy and fatigue mood measures. Journal of  
794 Psychosomatic Research. 2004;57(5):435-41.
- 795 51. Owen N, Healy GN, Matthews CE, Dunstan DW. Too Much Sitting: The Population Health Science of  
796 Sedentary Behavior. Exercise and Sport Sciences Reviews. 2010;38(3):105-13.
- 797 52. Papiés EK, Barsalou LW. Grounding desire and motivated behavior: A theoretical framework and  
798 review of empirical evidence. In: Hofmann W, Nordgren LF, editors. The Psychology of Desire. New York:  
799 Guilford Press; 2015.
- 800 53. Pettee Gabriel KK, Morrow JR, Jr., Woolsey A-LT. Framework for physical activity as a complex and  
801 multidimensional behavior. Journal of physical activity & health. 2012;9 Suppl 1:S11-8.
- 802 54. Piercy KL, Troiano RP, Ballard RM, Carlson SA, Fulton JE, Galuska DA, et al. The Physical Activity  
803 Guidelines for Americans. JAMA. 2018;320(19):2020-8.
- 804 55. Rauch HGL, Schönbacher G, Noakes TD. Neural correlates of motor vigour and motor urgency during  
805 exercise. Sports Medicine. 2013;43(4):227-41.
- 806 56. Recordati G. A thermodynamic model of the sympathetic and parasympathetic nervous systems.  
807 Autonomic Neuroscience-Basic & Clinical. 2003;103(1-2):1-12.
- 808 57. Redden JP. Desire over time: The multifaceted nature of satiation. The psychology of desire. New  
809 York, NY, US: The Guilford Press; 2015. p. 82-103.
- 810 58. Reiss S. Multifaceted nature of intrinsic motivation: The theory of 16 basic desires. Review of General  
811 Psychology. 2004;8(3):179-93.
- 812 59. Robbins TW, Everitt BJ. A role for mesencephalic dopamine in activation: commentary on Berridge  
813 (2006). Psychopharmacology (Berl). 2007;191(3):433-7.
- 814 60. Roberts MD, Gilpin L, Parker KE, Childs TE, Will MJ, Booth FW. Dopamine D1 receptor modulation  
815 in nucleus accumbens lowers voluntary wheel running in rats bred to run high distances. Physiology &  
816 Behavior. 2012;105(3):661-8.
- 817 61. Robinson TE, Berridge KC. The neural basis of drug craving: An incentive-sensitization theory of  
818 addiction. Brain Research Reviews. 1993;18(3):247-91.
- 819 62. Rowland TW. The biological basis of physical activity. Medicine and Science in Sports and Exercise.  
820 1998;30(3):392-9.
- 821 63. Ruppert E. Restless arms syndrome: prevalence, impact, and management strategies. Neuropsychiatr Dis  
822 Treat. 2019;15:1737-50.
- 823 64. Russell DW. In search of underlying dimensions: The use (and abuse) of factor analysis in Personality  
824 and Social Psychology Bulletin. Personality and Social Psychology Bulletin. 2002;28(12):1629-46.
- 825 65. Salamone JD. Complex motor and sensorimotor functions of striatal and accumbens dopamine-  
826 Involvement in instrumental behavior processes. Psychopharmacology. 1992;107(2-3):160-74.
- 827 66. Sayette MA, Wilson SJ. The measurement of desires and craving. In: Hofmann W, Nordgren L, editors.  
828 The Psychology of Desire. New York, NY: Guilford Press; 2015.
- 829 67. Shields C. Aristotle's De Anima, translated with commentary. Oxford 2016.
- 830 68. Singleton EG, Tiffany ST, Henningfield JE. Alcohol Craving Questionnaire (ACQ-NOW): Background,  
831 Scoring, and Administration (Manual). Baltimore, MD: Intramural Research Program, National Institute on  
832 Drug Abuse; 2000.

- 833 69. Sinha R. How does stress increase risk of drug abuse and relapse? *Psychopharmacology*.  
834 2001;158(4):343-59.
- 835 70. Sinha R. The clinical neurobiology of drug craving. *Current Opinion in Neurobiology*. 2013;23(4):649-  
836 54.
- 837 71. Sinha R, Gu P, Hart R, Guarnaccia JB. Food craving, cortisol and ghrelin responses in modeling highly  
838 palatable snack intake in the laboratory. *Physiol Behav*. 2019;208:112563.
- 839 72. Skinner GW, Mitchell D, Harden LM. Avoidance of physical activity is a sensitive indicator of illness.  
840 *Physiol Behav*. 2009;96(3):421-7.
- 841 73. Stedman HR. Rest and exercise in the treatment of nervous and mental disease. *Boston Medical and*  
842 *Surgical Journal*. 1896;CXXXIV:645-6.
- 843 74. Stults-Kolehmainen MA, Ciccolo JT, Bartholomew JB, Seifert J, Portman RS. Age and Gender-related  
844 Changes in Exercise Motivation among Highly Active Individuals. *Athletic Insight*. 2013;5(1):45-63.
- 845 75. Stults-Kolehmainen MA, Gilson TA, Abolt CJ. Feelings of acceptance and intimacy among teammates  
846 predict motivation in intercollegiate sport. *Journal of Sport Behavior*. 2013;36(3).
- 847 76. Stults-Kolehmainen MA, Sinha R. The effects of stress on physical activity and exercise: A systematic  
848 review. *Sports Medicine*. 2014;44(1):81-121.
- 849 77. Terry PC, Stevens MJ, Lane AM. Influence of response time frame on mood assessment. *Anxiety Stress*  
850 *and Coping*. 2005;18(3):279-85.
- 851 78. Thayer RE. Activation-Deactivation Adjective Check List: Current Overview and Structural Analysis.  
852 *Psychological Reports*. 1986;58(2):607-14.
- 853 79. Thayer RE. Problem perception, optimism, and related states as a function of time of day (diurnal  
854 rhythm) and moderate exercise: 2 arousal systems in interaction. *Motivation and Emotion*. 1987;11(1):19-36.
- 855 80. Thompson D, Batterham AM. Towards Integrated Physical Activity Profiling. *PLoS One*. 2013;8(2):9.
- 856 81. Tiffany ST. A critique of contemporary urge and craving research: Methodological, psychometric and  
857 theoretical issues. *Advances in Behaviour Research and Therapy*. 1992;14(3):123-39.
- 858 82. Tiggemann M, Kempers E. The phenomenology of food cravings: The role of mental imagery. *Appetite*.  
859 2005;45(3):305-13.
- 860 83. Vago DR, Zeidan F. The brain on silent: mind wandering, mindful awareness, and states of mental  
861 tranquility. *Ann N Y Acad Sci*. 2016;1373(1):96-113.
- 862 84. Van der Elst W, Molenberghs G, Hilgers D, Heussen N. CorrMixed: Estimate Correlations Between  
863 Repeatedly Measured Endpoints (E.g., Reliability) Based on Linear Mixed-Effects Models. R Package Version  
864 1.0 2018 [Available from: <https://CRAN.R-project.org/package=CorrMixed>].
- 865 85. Watson D. Intraindividual and Interindividual Analyses of Positive and Negative Affect: Their Relation  
866 to Health Complaints, Perceived Stress, and Daily Activities *Journal of Personality and Social Psychology*.  
867 1988;54(6):1020-30.
- 868 86. Williams DM, Dunsiger S, Ciccolo JT, Lewis BA, Albrecht AE, Marcus BH. Acute affective response  
869 to a moderate-intensity exercise stimulus predicts physical activity participation 6 and 12 months later.  
870 *Psychology of Sport and Exercise*. 2008;9(3):231-45.
- 871 87. Williams DM, Evans DR. Current Emotion Research in Health Behavior Science. *Emotion Review*.  
872 2014;6(3):277-87.
- 873 88. Windle M, Lerner RM. Reassessing the Dimensions of Temperamental Individuality Across the Life  
874 Span: The Revised Dimensions of Temperament Survey (DOTS-R). *Journal of Adolescent Research*.  
875 1986;1(2):213-30.
- 876
